# Supplementary material
Source: PubMed Central journal article supplement (PMC4717200)
Supplement: ejhg2015183x2.pdf [file ejhg2015183x2.pdf]

Table S1. The SNPs in this study and its amplification and extension primers

| SNP   | Position hg18 | Position hg19 | Haplogroup | Mutation    | Forward primer (5' -> 3')       | Reverse primer (5' -> 3')    | Extension primer (5' -> 3' )                            | Mutation Direction |
|-------|---------------|---------------|------------|-------------|---------------------------------|------------------------------|---------------------------------------------------------|--------------------|
| F2887 | 17399090      | 18889696      | Oβ3        | G -> T      | AACCACATTTTCATATTGAGATCGACA     | CCTTGGCATCCCTAGTACAGCCT      | GGTGGATTGCTGGATCATAT                                    | G -> T             |
| F3451 | 21934440      | 23525052      | O3a2c1b2   | C -> G      | TATTGCACTTCTTGAGAGAAGCAAATT     | GGCTCCATAGTTCTACTTAAACAAA    | CTTATAAAGAAATAGAAGACAGTTCTG                             | C -> G             |
| F444  | 16389860      | 17880466      | O3a2c1b    | C -> T      | AAACTTTCCAAATATTATATCGGTAGAC    | TTCTCACCAAATTAGAACTTATGAAGC  | CTATGGTGTTTATTTGGTGGATCGGTCA                            | C -> T             |
| F629  | 21299408      | 22890020      | O3a2c1b1   | C -> T      | GATGCCACTTCAGCATGTATGTAAG       | GAGCCGAGATCATGCCATTGCAC      | TGTTTGCTGGTGCACAAACGTGCCTGCACGCAC                       | G -> A             |
| F209  | 10380522      | 9770522       | Oβ2        | A -> C      | TATCATAACTTCAAATTATGAATTCAGCT   | GGTTCATTATATGTACACATTCATTAGG | ATTTAATACATAGATTATATTTGGATAGGAAAATGTG                   | T -> G             |
| M134  | 20175606      | 21716218      | O3a2c1     | C -> del    | AATTCTCATTACCCTGTGGAGAGA        | GGCTTTCTGAAGCAAATACCAGCTT    | CATTTACCACTGTGGAGAGATACTTTTGATCCCCACCAAT                | C -> A             |
| M117  | 20224700      | 21765312      | O3a2c1a    | AGAT -> del | TAGATGATAGAAAAACATAATATGGCTTA   | ACTTTTCTATAGAAGCAAAGATAATGT  | AATTGACAGTTATCAGTTTGAAATTATTTTTTCAGAAAGCAGAT            | A -> G             |
| F3386 | 21401484      | 22992096      | Oβ4        | G -> C      | TGTACAAATGTTTAATATGATTTTCAGAATA | CTGCTGAAGACAAATGTATATTATAGG  | ATTTTCAGAATACCTTTTTTAACCACATATTTCTGACCGGCTTAGAA         | G -> C             |
| F48   | 6956196       | 6896196       | Oβ1        | C -> T      | CCTGGAAGATCTGCTCAGAATCCT        | CTGACATCATGGATATTGGTAGAGG    | TCAACCTCACCTTCCAGGTGCAGTGATGGACAAGTTCTCCAGAGTCAC        | C -> T             |
| F1739 | 12758953      | 14248953      | Oβ5        | G -> C      | GCTACCAATCTATGTCCTGTCTCTA       | GAAGGAATGGAACCACTCATGGTTA    | AAAGCCTCTCTTGAATATATGACCTCAGAGAAGTACAATGTTAATCCCT       | C -> G             |
| F152  | 8602825       | 8542825       | Oβ1a       | G -> T      | GGCTGGTTGAAACCCACCAGGTT         | ACAGGACTGCAAGTGCCTCTCCT      | GTTCCAAATCAGCACCCCTTGTATAAAGAAGCCACTCTTATAGAAAGAAGAG    | G -> T             |
| F46   | 6920621       | 6860621       | Oβ         | A -> G      | GGATTCACTCTCAGGAGCCAGGT         | CACCAAGTGCACCCTGGCAGCT       | ATTAGGATTCAGTATACCCCTTGGGAGGAGCACTCTTGAACCCGTAACACCATCA | A -> G             |
