# Supplementary material
Source: PubMed Central journal article supplement (PMC4717200)
Supplement: ejhg2015183x3.pdf [file ejhg2015183x3.pdf]

Table S2. the genotype results of individuals in this study

| Sample number | Terminal SNPS                             | Ethnic | Region          | DYS19 | DYS389I | DYS389b | DYS390 | DYS391 | DYS392 | DYS393 | DYS437 | DYS438 | DYS439 | DYS448 | DYS456 | DYS458 | DYS635 | DATA-H4 | DYS385a | DYS385b |
|---------------|-------------------------------------------|--------|-----------------|-------|---------|---------|--------|--------|--------|--------|--------|--------|--------|--------|--------|--------|--------|---------|---------|---------|
| 1             | F3386+                                    | Han    | China East      | 15    | 12      | 15      | 23     | 10     | 12     | 13     | 15     | 10     | 13     | 19     | 15     | 16     | 19     | 11      | 12      | 16      |
| 2             | F1739+                                    | Han    | China Northeast | 15    | 13      | 16      | 23     | 10     | 12     | 12     | 15     | 10     | 11     | 19     | 15     | 19     | 20     | 12      | 13      | 16      |
| 3             | F209+, F2172+                             | Han    | China East      | 17    | 12      | 16      | 24     | 10     | 12     | 12     | 15     | 9      | 12     | 19     | 15     | 18     | 20     | 12      | 11      | 12      |
| 4             | F46+, F48-, F209-, F2887-, F3386-, F1739- | Han    | China North     | 15    | 12      | 16      | 23     | 10     | 12     | 12     | 15     | 10     | 12     | 19     | 16     | 18     | 19     | 13      | 12      | 16      |
| 5             | F3451+                                    | Han    | China North     | 15    | 12      | 17      | 23     | 10     | 12     | 12     | 15     | 11     | 12     | 20     | 14     | 19     | 22     | 11      | 12      | 12      |
| 6             | F279+, F152+, F2112+                      | Han    | China North     | 15    | 12      | 17      | 23     | 10     | 12     | 12     | 15     | 10     | 12     | 19     | 15     | 17     | 19     | 12      | 12      | 18      |
| 7             | F2887+                                    | Han    | China East      | 15    | 12      | 17      | 23     | 11     | 12     | 12     | 15     | 10     | 13     | 19     | 17     | 19     | 20     | 12      | 12      | 16      |
| 8             | F3386+                                    | Han    | China East      | 15    | 12      | 15      | 23     | 10     | 12     | 13     | 15     | 10     | 13     | 19     | 16     | 20     | 20     | 11      | 11      | 16      |
| 9             | F48+, F279-, F152-                        | Han    | China East      | 15    | 12      | 17      | 22     | 11     | 12     | 12     | 15     | 10     | 12     | 19     | 15     | 18     | 19     | 12      | 11      | 15      |
| 10            | F209+                                     | Han    | China East      | 16    | 12      | 16      | 23     | 10     | 12     | 12     | 16     | 10     | 13     | 19     | 15     | 18     | 20     | 11      | 12      | 16      |
| 11            | F279+, F152+                              | Han    | China North     | 15    | 12      | 16      | 23     | 10     | 12     | 12     | 15     | 10     | 12     | 19     | 15     | 18     | 19     | 12      | 13      | 19      |
| 12            | F279+, F152+                              | Han    | China North     | 15    | 12      | 15      | 23     | 10     | 12     | 12     | 14     | 10     | 11     | 19     | 15     | 18     | 19     | 12      | 12      | 18      |
| 13            | F1739+                                    | Han    | China North     | 15    | 13      | 16      | 23     | 10     | 12     | 12     | 15     | 10     | 11     | 19     | 15     | 18     | 21     | 14      | 13      | 13      |
| 14            | F2887+                                    | Han    | China Northwest | 14    | 12      | 17      | 23     | 11     | 12     | 12     | 15     | 10     | 13     | 19     | 15     | 17     | 20     | 12      | 12      | 17      |
| 15            | F3451+                                    | Han    | China East      | 15    | 12      | 16      | 24     | 10     | 12     | 12     | 16     | 10     | 11     | 18     | 16     | 19     | 24     | 11      | 11      | 18      |
| 16            | F3451+                                    | Han    | China North     | 15    | 12      | 18      | 23     | 10     | 12     | 12     | 15     | 11     | 12     | 20     | 15     | 18     | 24     | 12      | 12      | 12      |
| 17            | F2887+                                    | Han    | China Northwest | 16    | 12      | 16      | 23     | 9      | 12     | 12     | 15     | 10     | 13     | 19     | 15     | 19     | 19     | 11      | 12      | 17      |

|    |                                           |     |                 |    |    |    |    |    |    |    |    |    |    |    |    |    |    |    |    |    |
|----|-------------------------------------------|-----|-----------------|----|----|----|----|----|----|----|----|----|----|----|----|----|----|----|----|----|
| 18 | F629+, F46-                               | Han | China East      | 15 | 13 | 16 | 24 | 10 | 12 | 12 | 15 | 10 | 13 | 20 | 15 | 20 | 21 | 11 | 12 | 17 |
| 19 | F2887+                                    | Han | China Southwest | 15 | 12 | 17 | 23 | 10 | 13 | 12 | 15 | 10 | 11 | 19 | 15 | 18 | 19 | 12 | 13 | 18 |
| 20 | F46+, F48-, F209-, F2887-, F3386-, F1739- | Han | China Northwest | 16 | 12 | 15 | 23 | 10 | 12 | 12 | 16 | 10 | 12 | 19 | 15 | 19 | 20 | 11 | 12 | 17 |
| 21 | F2887+                                    | Han | China East      | 14 | 12 | 16 | 23 | 10 | 12 | 12 | 15 | 10 | 12 | 19 | 15 | 18 | 19 | 12 | 12 | 17 |
| 22 | F2887+                                    | Man | China North     | 15 | 12 | 17 | 23 | 11 | 13 | 12 | 15 | 10 | 12 | 19 | 16 | 17 | 20 | 12 | 12 | 16 |
| 23 | F209+                                     | Han | China East      | 15 | 12 | 17 | 23 | 10 | 12 | 12 | 15 | 10 | 13 | 19 | 16 | 19 | 21 | 12 | 12 | 17 |
| 24 | F2887+                                    | Han | China North     | 15 | 12 | 15 | 23 | 10 | 12 | 12 | 15 | 10 | 14 | 20 | 15 | 17 | 20 | 11 | 13 | 16 |
| 25 | F209+                                     | Han | China East      | 15 | 13 | 19 | 23 | 10 | 12 | 12 | 15 | 9  | 12 | 19 | 15 | 19 | 19 | 12 | 12 | 12 |
| 26 | F2887+, F1413+, F2281+                    | Han | China Southwest | 16 | 12 | 16 | 23 | 10 | 12 | 12 | 15 | 10 | 13 | 19 | 15 | 16 | 19 | 10 | 12 | 17 |
| 27 | F3386+                                    | Han | China East      | 15 | 12 | 15 | 23 | 10 | 12 | 13 | 15 | 10 | 12 | 19 | 15 | 18 | 20 | 11 | 12 | 17 |
| 28 | F209+                                     | Han | China East      | 15 | 12 | 16 | 23 | 10 | 12 | 13 | 15 | 10 | 11 | 19 | 15 | 18 | 19 | 12 | 12 | 13 |
| 29 | F46+, F48-, F209-, F2887-, F3386-, F1739- | Han | China Northwest | 15 | 12 | 16 | 23 | 10 | 12 | 12 | 15 | 10 | 12 | 19 | 15 | 18 | 20 | 12 | 12 | 18 |
| 30 | F209+                                     | Han | China North     | 14 | 12 | 17 | 23 | 10 | 12 | 12 | 15 | 10 | 12 | 19 | 15 | 18 | 19 | 12 | 12 | 16 |
| 31 | F3451+                                    | Han | China North     | 15 | 12 | 16 | 23 | 9  | 12 | 13 | 15 | 10 | 11 | 19 | 15 | 18 | 21 | 11 | 12 | 16 |
| 32 | F2887+                                    | Han | China Southwest | 15 | 12 | 17 | 23 | 10 | 12 | 12 | 15 | 10 | 12 | 19 | 15 | 18 | 19 | 11 | 12 | 16 |
| 33 | F2887+                                    | Han | China Northwest | 15 | 12 | 16 | 23 | 11 | 12 | 12 | 15 | 10 | 13 | 20 | 16 | 17 | 20 | 12 | 11 | 16 |
| 34 | F2887+                                    | Han | China East      | 15 | 12 | 16 | 23 | 10 | 12 | 12 | 14 | 10 | 12 | 19 | 14 | 18 | 19 | 12 | 12 | 17 |
| 35 | F2887+                                    | Han | China North     | 16 | 12 | 16 | 23 | 10 | 13 | 12 | 14 | 10 | 13 | 19 | 16 | 18 | 19 | 12 | 12 | 15 |
| 36 | F46+, F48-, F209-, F2887-, F3386-, F1739- | Han | China Southwest | 15 | 14 | 17 | 24 | 10 | 12 | 12 | 15 | 10 | 12 | 19 | 15 | 18 | 20 | 12 | 12 | 15 |

|    |                                           |     |                 |    |    |    |    |    |    |    |    |    |    |    |    |    |    |    |    |    |
|----|-------------------------------------------|-----|-----------------|----|----|----|----|----|----|----|----|----|----|----|----|----|----|----|----|----|
| 37 | F48+, F279-, F152-                        | Han | China East      | 15 | 12 | 17 | 23 | 11 | 12 | 12 | 15 | 10 | 12 | 19 | 15 | 20 | 19 | 11 | 12 | 18 |
| 38 | F3386+                                    | Han | China East      | 15 | 12 | 15 | 23 | 10 | 12 | 13 | 15 | 10 | 13 | 19 | 15 | 18 | 20 | 11 | 13 | 16 |
| 39 | F3386+                                    | Han | China East      | 15 | 12 | 15 | 23 | 10 | 12 | 14 | 15 | 10 | 12 | 19 | 15 | 18 | 20 | 12 | 12 | 12 |
| 40 | F2887+                                    | Han | China South     | 16 | 12 | 17 | 23 | 10 | 12 | 12 | 14 | 10 | 12 | 19 | 16 | 18 | 19 | 12 | 12 | 16 |
| 41 | F209+                                     | Han | China North     | 16 | 12 | 15 | 23 | 10 | 12 | 12 | 15 | 10 | 12 | 19 | 15 | 19 | 19 | 12 | 12 | 12 |
| 42 | F2887+                                    | Han | China North     | 15 | 11 | 15 | 23 | 11 | 12 | 12 | 15 | 10 | 13 | 19 | 14 | 18 | 19 | 12 | 12 | 15 |
| 43 | F46+, F48-, F209-, F2887-, F3386-, F1739- | Han | China North     | 16 | 12 | 15 | 24 | 11 | 12 | 12 | 15 | 10 | 13 | 19 | 15 | 18 | 20 | 12 | 11 | 17 |
| 44 | F2887+                                    | Han | China North     | 15 | 12 | 15 | 23 | 10 | 12 | 12 | 15 | 10 | 13 | 19 | 15 | 17 | 20 | 11 | 12 | 16 |
| 45 | F2887+                                    | Han | China Northeast | 15 | 12 | 17 | 23 | 10 | 12 | 12 | 15 | 10 | 13 | 18 | 16 | 16 | 19 | 12 | 12 | 12 |
| 46 | F209+                                     | Han | China Northeast | 13 | 12 | 16 | 23 | 10 | 12 | 12 | 15 | 10 | 12 | 18 | 15 | 18 | 19 | 11 | 12 | 17 |
| 47 | F46+, F48-, F209-, F2887-, F3386-, F1739- | Han | China Northeast | 15 | 12 | 16 | 23 | 10 | 12 | 13 | 14 | 10 | 11 | 19 | 15 | 19 | 20 | 11 | 12 | 18 |
| 48 | F46+, F48-, F209-, F2887-, F3386-, F1739- | Han | China Northeast | 15 | 13 | 15 | 23 | 10 | 12 | 12 | 15 | 10 | 13 | 19 | 15 | 19 | 20 | 13 | 13 | 16 |
| 49 | F2887+                                    | Han | China East      | 15 | 11 | 16 | 23 | 11 | 12 | 12 | 15 | 10 | 13 | 19 | 16 | 17 | 21 | 12 | 11 | 15 |
| 50 | F3451+                                    | Han | China East      | 15 | 12 | 16 | 23 | 10 | 13 | 12 | 14 | 10 | 13 | 18 | 15 | 18 | 20 | 12 | 12 | 13 |
| 51 | F209+                                     | Han | China Southwest | 13 | 12 | 15 | 23 | 11 | 12 | 12 | 15 | 10 | 12 | 18 | 15 | 18 | 19 | 12 | 12 | 16 |
| 52 | F209+                                     | Han | China Northwest | 15 | 12 | 19 | 23 | 10 | 12 | 12 | 15 | 10 | 12 | 19 | 15 | 20 | 19 | 12 | 12 | 14 |
| 53 | F209+                                     | Han | China North     | 15 | 12 | 17 | 23 | 10 | 12 | 13 | 15 | 10 | 11 | 19 | 15 | 19 | 19 | 13 | 11 | 16 |
| 54 | F46+, F48-, F209-, F2887-, F3386-, F1739- | Han | China East      | 15 | 12 | 16 | 23 | 11 | 12 | 12 | 15 | 10 | 11 | 18 | 15 | 19 | 21 | 11 | 12 | 16 |
| 55 | F209+                                     | Han | China South     | 13 | 12 | 18 | 24 | 10 | 12 | 12 | 15 | 10 | 11 | 20 | 14 | 19 | 20 | 12 | 12 | 16 |

|    |                    |     |                 |    |    |    |    |    |    |    |    |    |    |    |    |    |    |    |    |    |
|----|--------------------|-----|-----------------|----|----|----|----|----|----|----|----|----|----|----|----|----|----|----|----|----|
| 56 | F209+              | Han | China North     | 13 | 12 | 17 | 24 | 10 | 12 | 12 | 15 | 10 | 11 | 19 | 15 | 17 | 19 | 12 | 12 | 15 |
| 57 | F2887+             | Han | China North     | 15 | 12 | 16 | 23 | 11 | 12 | 12 | 15 | 10 | 13 | 19 | 16 | 17 | 20 | 12 | 12 | 17 |
| 58 | F2887+             | Han | China South     | 16 | 12 | 17 | 23 | 10 | 13 | 12 | 15 | 10 | 11 | 19 | 15 | 17 | 19 | 11 | 12 | 18 |
| 59 | F48+, F279-, F152- | Han | China East      | 15 | 12 | 17 | 23 | 10 | 13 | 12 | 14 | 10 | 11 | 19 | 15 | 20 | 19 | 12 | 12 | 17 |
| 60 | F2887+             | Han | China South     | 14 | 12 | 16 | 24 | 10 | 12 | 12 | 15 | 10 | 13 | 19 | 17 | 19 | 20 | 12 | 11 | 16 |
| 61 | F48+, F279-, F152- | Han | China East      | 15 | 12 | 17 | 23 | 10 | 12 | 12 | 15 | 10 | 11 | 19 | 15 | 17 | 19 | 12 | 12 | 19 |
| 62 | F48+, F279-, F152- | Han | China East      | 16 | 12 | 16 | 24 | 10 | 12 | 12 | 15 | 10 | 11 | 20 | 15 | 16 | 20 | 11 | 12 | 17 |
| 63 | F209+              | Han | China North     | 16 | 12 | 17 | 23 | 10 | 12 | 12 | 15 | 10 | 12 | 19 | 15 | 20 | 20 | 12 | 12 | 12 |
| 64 | F3451+             | Han | China North     | 15 | 12 | 17 | 24 | 10 | 12 | 12 | 15 | 11 | 12 | 20 | 15 | 20 | 22 | 12 | 12 | 12 |
| 65 | F2887+             | Han | China North     | 15 | 12 | 16 | 23 | 10 | 12 | 12 | 15 | 10 | 12 | 19 | 15 | 19 | 19 | 12 | 12 | 15 |
| 66 | F2887+             | Han | China Northwest | 15 | 12 | 17 | 24 | 10 | 12 | 12 | 15 | 10 | 12 | 19 | 14 | 18 | 19 | 12 | 12 | 17 |
| 67 | F3386+             | Han | China East      | 15 | 12 | 16 | 23 | 11 | 12 | 13 | 15 | 10 | 13 | 19 | 14 | 20 | 20 | 11 | 12 | 16 |
| 68 | F2887+             | Man | China North     | 15 | 12 | 16 | 23 | 11 | 12 | 12 | 15 | 10 | 12 | 19 | 16 | 20 | 19 | 11 | 12 | 17 |
| 69 | F2887+             | Han | China East      | 15 | 12 | 16 | 23 | 10 | 12 | 11 | 14 | 10 | 12 | 19 | 16 | 19 | 19 | 12 | 12 | 18 |
| 70 | F2887+             | Han | China East      | 14 | 12 | 18 | 23 | 10 | 12 | 12 | 15 | 10 | 13 | 19 | 15 | 18 | 20 | 12 | 12 | 16 |
| 71 | F2887+             | Han | China East      | 15 | 12 | 16 | 23 | 11 | 12 | 12 | 14 | 10 | 13 | 20 | 16 | 18 | 20 | 11 | 12 | 16 |
| 72 | F279+, F152+       | Han | China North     | 15 | 12 | 16 | 23 | 10 | 12 | 12 | 15 | 10 | 12 | 19 | 15 | 18 | 20 | 12 | 12 | 17 |
| 73 | F2887+             | Han | China Northeast | 15 | 12 | 16 | 23 | 11 | 12 | 12 | 15 | 10 | 14 | 19 | 16 | 17 | 20 | 12 | 13 | 17 |
| 74 | F2887+             | Han | China Northeast | 15 | 12 | 16 | 23 | 11 | 12 | 12 | 15 | 10 | 14 | 19 | 16 | 17 | 20 | 12 | 13 | 17 |

|    |                                           |     |                 |    |    |    |    |    |    |    |    |    |    |    |    |    |    |    |    |    |
|----|-------------------------------------------|-----|-----------------|----|----|----|----|----|----|----|----|----|----|----|----|----|----|----|----|----|
| 75 | F2887+                                    | Han | China Northeast | 15 | 12 | 15 | 23 | 11 | 12 | 12 | 15 | 10 | 14 | 19 | 16 | 17 | 20 | 12 | 13 | 17 |
| 76 | F3451+                                    | Han | China East      | 15 | 12 | 17 | 23 | 10 | 12 | 12 | 15 | 10 | 11 | 19 | 15 | 15 | 20 | 12 | 13 | 17 |
| 77 | F2887+                                    | Han | China North     | 15 | 12 | 16 | 23 | 11 | 12 | 12 | 15 | 10 | 13 | 19 | 17 | 17 | 20 | 12 | 13 | 16 |
| 78 | F3451+                                    | Han | China South     | 15 | 12 | 16 | 24 | 10 | 12 | 12 | 15 | 11 | 12 | 20 | 15 | 19 | 22 | 12 | 12 | 12 |
| 79 | F2887+                                    | Han | China East      | 16 | 12 | 16 | 23 | 10 | 12 | 12 | 15 | 10 | 12 | 19 | 16 | 18 | 21 | 11 | 13 | 17 |
| 80 | F209+                                     | Han | China South     | 17 | 12 | 15 | 23 | 10 | 12 | 12 | 15 | 10 | 13 | 19 | 15 | 20 | 19 | 12 | 12 | 12 |
| 81 | F2887+                                    | Han | China South     | 15 | 12 | 15 | 23 | 10 | 12 | 12 | 14 | 10 | 12 | 19 | 14 | 17 | 19 | 12 | 12 | 16 |
| 82 | F3451+                                    | Han | China East      | 15 | 12 | 16 | 23 | 10 | 12 | 12 | 15 | 10 | 11 | 18 | 16 | 19 | 22 | 11 | 18 | 18 |
| 83 | F46+, F48-, F209-, F2887-, F3386-, F1739- | Han | China North     | 15 | 12 | 16 | 23 | 10 | 12 | 12 | 14 | 10 | 11 | 19 | 15 | 18 | 21 | 12 | 12 | 17 |
| 84 | F209+                                     | Han | China East      | 17 | 12 | 18 | 23 | 10 | 12 | 12 | 16 | 10 | 12 | 19 | 15 | 19 | 19 | 12 | 11 | 17 |
| 85 | F2887+                                    | Han | China North     | 15 | 12 | 17 | 23 | 10 | 12 | 12 | 15 | 8  | 12 | 17 | 15 | 17 | 20 | 11 | 12 | 16 |
| 86 | F2887+                                    | Han | China East      | 14 | 12 | 16 | 23 | 10 | 12 | 12 | 15 | 10 | 12 | 19 | 15 | 18 | 20 | 12 | 12 | 16 |
| 87 | F3386+                                    | Han | China East      | 15 | 12 | 15 | 23 | 10 | 12 | 13 | 15 | 10 | 13 | 19 | 15 | 20 | 20 | 12 | 12 | 16 |
| 88 | F46+, F48-, F209-, F2887-, F3386-, F1739- | Han | China North     | 15 | 12 | 15 | 23 | 10 | 12 | 12 | 15 | 10 | 12 | 20 | 15 | 18 | 20 | 12 | 12 | 18 |
| 89 | F46+, F48-, F209-, F2887-, F3386-, F1739- | Han | China South     | 15 | 13 | 16 | 23 | 10 | 12 | 12 | 15 | 10 | 12 | 20 | 16 | 17 | 20 | 12 | 14 | 16 |
| 90 | F3386+                                    | Han | China North     | 15 | 12 | 15 | 22 | 10 | 12 | 13 | 15 | 10 | 11 | 19 | 16 | 17 | 20 | 12 | 12 | 16 |
| 91 | F46+, F48-, F209-, F2887-, F3386-, F1739- | Han | China North     | 15 | 13 | 16 | 24 | 10 | 12 | 12 | 15 | 10 | 12 | 19 | 15 | 15 | 20 | 11 | 12 | 17 |
| 92 | F209+                                     | Hui | China East      | 15 | 12 | 17 | 23 | 11 | 12 | 12 | 14 | 10 | 11 | 18 | 15 | 19 | 19 | 12 | 12 | 12 |
| 93 | F46+, F48-, F209-, F2887-, F3386-, F1739- | Han | China East      | 16 | 13 | 19 | 23 | 10 | 12 | 12 | 14 | 10 | 13 | 19 | 15 | 18 | 19 | 11 | 11 | 16 |

|     |                                           |     |                 |    |    |    |    |    |    |    |    |    |    |    |    |    |    |    |    |    |
|-----|-------------------------------------------|-----|-----------------|----|----|----|----|----|----|----|----|----|----|----|----|----|----|----|----|----|
| 94  | F2887+                                    | Han | China North     | 14 | 12 | 17 | 23 | 11 | 12 | 12 | 15 | 10 | 13 | 19 | 15 | 18 | 20 | 11 | 12 | 16 |
| 95  | F2887+                                    | Han | China East      | 15 | 12 | 16 | 23 | 10 | 12 | 12 | 15 | 11 | 11 | 18 | 15 | 17 | 19 | 12 | 11 | 15 |
| 96  | F209+                                     | Han | China South     | 13 | 12 | 16 | 23 | 11 | 12 | 12 | 15 | 10 | 14 | 18 | 15 | 18 | 19 | 12 | 12 | 15 |
| 97  | F2887+                                    | Han | China North     | 15 | 11 | 16 | 23 | 11 | 12 | 12 | 15 | 10 | 12 | 19 | 15 | 17 | 20 | 12 | 12 | 16 |
| 98  | F209+                                     | Han | China East      | 16 | 12 | 15 | 23 | 10 | 12 | 12 | 15 | 10 | 12 | 19 | 15 | 19 | 19 | 11 | 12 | 12 |
| 99  | F209+                                     | Han | China Northeast | 15 | 14 | 16 | 23 | 10 | 12 | 13 | 15 | 10 | 11 | 19 | 15 | 19 | 20 | 12 | 12 | 12 |
| 100 | F279+, F152+                              | Han | China North     | 15 | 12 | 16 | 23 | 10 | 12 | 12 | 15 | 10 | 12 | 19 | 15 | 19 | 19 | 12 | 12 | 19 |
| 101 | F2887+                                    | Man | China Northeast | 15 | 12 | 17 | 23 | 12 | 12 | 12 | 15 | 10 | 13 | 19 | 18 | 18 | 20 | 12 | 12 | 16 |
| 102 | F2887+                                    | Han | China East      | 15 | 12 | 16 | 23 | 11 | 12 | 12 | 15 | 10 | 12 | 19 | 16 | 19 | 21 | 12 | 12 | 15 |
| 103 | F2887+                                    | Han | China East      | 15 | 12 | 16 | 23 | 10 | 12 | 12 | 15 | 10 | 12 | 20 | 15 | 20 | 19 | 12 | 12 | 16 |
| 104 | F209+                                     | Han | China East      | 15 | 13 | 16 | 23 | 10 | 12 | 12 | 15 | 10 | 12 | 19 | 15 | 19 | 19 | 13 | 12 | 13 |
| 105 | F209+                                     | Han | China North     | 16 | 12 | 16 | 22 | 11 | 12 | 12 | 15 | 10 | 12 | 19 | 15 | 18 | 19 | 12 | 12 | 12 |
| 106 | F209+                                     | Han | China East      | 15 | 12 | 17 | 23 | 10 | 12 | 12 | 15 | 10 | 14 | 19 | 15 | 18 | 19 | 11 | 12 | 16 |
| 107 | F46+, F48-, F209-, F2887-, F3386-, F1739- | Han | China East      | 15 | 12 | 18 | 23 | 10 | 12 | 12 | 14 | 10 | 12 | 19 | 16 | 16 | 19 | 12 | 11 | 16 |
| 108 | F3451+                                    | Han | China South     | 15 | 12 | 18 | 23 | 10 | 12 | 12 | 15 | 10 | 11 | 19 | 15 | 18 | 23 | 11 | 12 | 20 |
| 109 | F209+                                     | Han | China East      | 16 | 12 | 18 | 22 | 10 | 12 | 12 | 16 | 10 | 12 | 19 | 15 | 19 | 19 | 12 | 12 | 17 |
| 110 | F46+, F48-, F209-, F2887-, F3386-, F1739- | Han | China East      | 15 | 12 | 16 | 23 | 10 | 12 | 12 | 15 | 10 | 12 | 19 | 15 | 17 | 19 | 12 | 12 | 16 |
| 111 | F46+, F48-, F209-, F2887-, F3386-, F1739- | Han | China South     | 15 | 12 | 16 | 22 | 11 | 12 | 12 | 14 | 10 | 12 | 19 | 15 | 18 | 20 | 12 | 12 | 12 |
| 112 | F209+                                     | Han | China East      | 17 | 12 | 16 | 23 | 10 | 12 | 12 | 16 | 10 | 12 | 19 | 14 | 18 | 19 | 12 | 12 | 17 |



|     |                                           |        |                 |    |    |    |    |    |    |    |    |    |    |    |    |    |    |    |    |    |
|-----|-------------------------------------------|--------|-----------------|----|----|----|----|----|----|----|----|----|----|----|----|----|----|----|----|----|
| 132 | F279+, F152+                              | Han    | China North     | 15 | 12 | 17 | 23 | 10 | 12 | 12 | 15 | 10 | 12 | 19 | 15 | 19 | 19 | 12 | 12 | 17 |
| 133 | F46+, F48-, F209-, F2887-, F3386-, F1739- | Han    | China East      | 14 | 12 | 17 | 23 | 11 | 12 | 12 | 15 | 10 | 12 | 19 | 16 | 16 | 20 | 12 | 12 | 16 |
| 134 | F48+, F279-, F152-                        | Han    | China South     | 15 | 12 | 17 | 22 | 10 | 12 | 12 | 14 | 10 | 12 | 19 | 16 | 17 | 19 | 12 | 12 | 17 |
| 135 | F2887+                                    | Han    | China East      | 16 | 12 | 16 | 23 | 10 | 12 | 12 | 14 | 10 | 12 | 19 | 16 | 18 | 19 | 12 | 12 | 17 |
| 136 | F2887+                                    | Han    | China South     | 15 | 12 | 15 | 23 | 10 | 12 | 12 | 15 | 10 | 12 | 19 | 17 | 18 | 20 | 11 | 12 | 16 |
| 137 | F209+                                     | Han    | China South     | 15 | 12 | 17 | 23 | 10 | 12 | 12 | 15 | 10 | 12 | 19 | 15 | 19 | 19 | 12 | 12 | 12 |
| 138 | F2887+                                    | Han    | China Northwest | 16 | 12 | 16 | 23 | 10 | 12 | 12 | 14 | 10 | 13 | 19 | 17 | 18 | 21 | 12 | 12 | 15 |
| 139 | F2887+                                    | Han    | China East      | 15 | 12 | 16 | 23 | 10 | 12 | 12 | 14 | 10 | 12 | 19 | 15 | 18 | 19 | 12 | 12 | 16 |
| 140 | F2887+                                    | Mongol | China Northeast | 14 | 12 | 16 | 21 | 11 | 12 | 12 | 13 | 9  | 9  | 19 | 16 | 18 | 19 | 12 | 12 | 18 |
| 141 | F279+, F152+                              | Mongol | China Northeast | 15 | 12 | 17 | 23 | 10 | 12 | 12 | 15 | 10 | 12 | 19 | 15 | 18 | 20 | 12 | 12 | 18 |
| 142 | F209+                                     | Hui    | China North     | 15 | 12 | 17 | 23 | 10 | 12 | 12 | 15 | 10 | 13 | 19 | 15 | 17 | 20 | 12 | 12 | 16 |
| 143 | F46+, F48-, F209-, F2887-, F3386-, F1739- | Hui    | China North     | 15 | 12 | 16 | 24 | 10 | 12 | 12 | 15 | 10 | 11 | 20 | 15 | 17 | 20 | 11 | 12 | 16 |
| 144 | F2887+                                    | Hui    | China North     | 15 | 11 | 17 | 23 | 10 | 12 | 12 | 15 | 10 | 14 | 19 | 15 | 19 | 21 | 12 | 12 | 16 |
| 145 | F209+                                     | Hui    | China North     | 15 | 12 | 18 | 23 | 10 | 12 | 12 | 15 | 10 | 12 | 19 | 15 | 17 | 20 | 12 | 12 | 16 |
| 146 | F2887+                                    | Hui    | China North     | 15 | 13 | 16 | 23 | 10 | 13 | 12 | 15 | 10 | 13 | 19 | 15 | 18 | 19 | 11 | 12 | 16 |
| 147 | F209+                                     | Hui    | China North     | 16 | 12 | 16 | 24 | 10 | 12 | 12 | 15 | 10 | 11 | 18 | 15 | 17 | 19 | 12 | 12 | 16 |
| 148 | F209+                                     | Hui    | China North     | 15 | 12 | 16 | 23 | 10 | 12 | 12 | 15 | 10 | 12 | 19 | 15 | 17 | 20 | 12 | 12 | 16 |
| 149 | F209+                                     | Hui    | China North     | 15 | 12 | 16 | 23 | 10 | 12 | 12 | 15 | 10 | 13 | 19 | 15 | 17 | 20 | 12 | 12 | 16 |
| 150 | F46+, F48-, F209-, F2887-, F3386-, F1739- | Hui    | China North     | 15 | 12 | 16 | 23 | 10 | 12 | 12 | 15 | 10 | 12 | 19 | 14 | 20 | 24 | 11 | 14 | 17 |



|     |        |     |                 |    |    |    |    |    |    |    |    |    |    |    |    |    |    |    |    |    |
|-----|--------|-----|-----------------|----|----|----|----|----|----|----|----|----|----|----|----|----|----|----|----|----|
| 151 | F209+  | Hui | China North     | 15 | 12 | 16 | 23 | 10 | 12 | 12 | 15 | 10 | 13 | 19 | 15 | 17 | 20 | 12 | 12 | 16 |
| 152 | F209+  | Hui | China North     | 15 | 12 | 16 | 23 | 10 | 12 | 12 | 15 | 10 | 12 | 19 | 15 | 17 | 20 | 12 | 12 | 16 |
| 153 | F209+  | Hui | China North     | 16 | 12 | 16 | 24 | 10 | 12 | 12 | 15 | 10 | 12 | 18 | 15 | 18 | 19 | 12 | 12 | 16 |
| 154 | F2887+ | Hui | China Northwest | 15 | 12 | 17 | 24 | 10 | 12 | 12 | 14 | 10 | 13 | 19 | 17 | 18 | 20 | 12 | 12 | 17 |

---
