# Supplementary material
Source: PubMed Central journal article supplement (PMC4717200)
Supplement: ejhg2015183x4.pdf [file ejhg2015183x4.pdf]

Table S3. the frequency distribution of Haplogroup O-M134 generated in this study and previously published data

| Country     | Population       | Longitude | Latitude | Sample size | Number of M134+ samples | Percentage (%) | Reference            | M134 or M134 (xM117) |
|-------------|------------------|-----------|----------|-------------|-------------------------|----------------|----------------------|----------------------|
| Burman      | Burma            | 96.3      | 19.6     | 106         | 0                       | 0              | Peng MS_2013         | M134                 |
| Mongol      | Northwest Mongol | 92.98     | 49.24    | 160         | 7                       | 4.12           | Di Cristofaro J_2013 | M134                 |
| Kyrgyzstan  | Kyrgyzstan       | 75.47     | 42.35    | 132         | 5                       | 3.78           | Di Cristofaro J_2013 | M134                 |
| Afghanistan | Jawzjan          | 36.52     | 65.48    | 74          | 1                       | 1.35           | Di Cristofaro J_2013 | M134                 |
| China       | Uyghur           | 43.56     | 87.45    | 6           | 1                       | 16.7           | Di Cristofaro J_2013 | M134                 |
| Afghanistan | Uzbek Afghan     | 64.74     | 36.6     | 127         | 0                       | 0              | Di Cristofaro J_2013 | M134                 |
| Afghanistan | Tajik Afghan     | 68.86     | 36.68    | 142         | 0                       | 0              | Di Cristofaro J_2013 | M134                 |
| Afghanistan | Hazara Afghan    | 67.21     | 35.61    | 77          | 0                       | 0              | Di Cristofaro J_2013 | M134                 |
| Iran        | Iran             | 51.67     | 32.65    | 186         | 0                       | 0              | Di Cristofaro J_2013 | M134                 |
| China       | Ngari Tibetan    | 80.1      | 32.37    | 211         | 1                       | 0.47           | Qi XB_2013           | M134xM117            |
| China       | Qamdo Tibetan    | 97.14     | 31.18    | 119         | 4                       | 3.36           | Qi XB_2013           | M134xM117            |
| China       | Lhasa Tibetan    | 91.14     | 29.64    | 814         | 27                      | 3.32           | Qi XB_2013           | M134xM117            |
| China       | Nyingchi Tibetan | 95.75     | 29.85    | 117         | 5                       | 4.27           | Qi XB_2013           | M134xM117            |

|                                |                     |        |       |     |    |       |                  |           |
|--------------------------------|---------------------|--------|-------|-----|----|-------|------------------|-----------|
| China                          | Amdo Tibetan        | 91.65  | 32.26 | 219 | 3  | 1.37  | Qi XB_2013       | M134xM117 |
| China                          | Shigatse Tibetan    | 88.82  | 29.28 | 434 | 17 | 3.92  | Qi XB_2013       | M134xM117 |
| China                          | Shannan Tibetan     | 91.76  | 29.18 | 156 | 3  | 1.92  | Qi XB_2013       | M134xM117 |
| Philippines                    | North Philippines   | 121.41 | 17.01 | 121 | 0  | 0     | Delfin F_2010    | M134      |
| Philippines                    | Central Philippines | 121.72 | 13.79 | 119 | 0  | 0     | Delfin F_2010    | M134      |
| Philippines                    | South Philippines   | 125.59 | 8.9   | 150 | 0  | 0     | Delfin F_2010    | M134      |
| Indonesia, Malaysia,<br>Brunei | Borneo              | 113.34 | -2.11 | 86  | 0  | 0     | Karafet TM_2010  | M134      |
| Indonesia                      | Bali                | 115.2  | -8.69 | 641 | 0  | 0     | Karafet TM_2010  | M134      |
| Korea                          | Korea               | 127.4  | 36.33 | 706 | 68 | 9.63  | Park MJ_2012     | M134      |
| Russia                         | Yakut               | 129.79 | 62    |     | 0  | 0     | Pakendorf B_2006 | M134      |
| Japan                          | Japanese            | 136.92 | 35.16 | 165 | 6  | 3.64  | Nonaka I_2007    | M134      |
| India                          | Punjab India        | 75.62  | 31.28 | 66  | 0  | 0     | Kivisild T_2003  | M134      |
| Pakistan                       | Pakistan            | 70.54  | 29.1  | 638 | 0  | 0     | Fisarar S_2007   | M134      |
| Nepal                          | Katmandu Nepal      | 85.33  | 27.7  | 77  | 2  | 2.6   | Gayden T_2007    | M134      |
| Thailand                       | Thailand            | 100.1  | 15.83 | 60  | 7  | 11.67 | Shi H_2005       | M134xM117 |

|       |                         |         |        |     |    |       |              |           |
|-------|-------------------------|---------|--------|-----|----|-------|--------------|-----------|
| India | Mei gallas, Kathy India | 91.32   | 25.49  | 92  | 15 | 16.3  | Kumar V_2007 | M134xM117 |
| India | Munda India             | 83.5    | 23     | 780 | 0  | 0     | Kumar V_2007 | M134      |
| China | Zayu Deng               | 97.05   | 28.47  | 90  | 28 | 31.11 | Kang LL_2011 | M134xM117 |
| China | Millin loba             | 94.22   | 29     | 130 | 3  | 2.31  | Kang LL_2011 | M134xM117 |
| China | Han Yunnan              | 102.8   | 24.96  | 81  | 1  | 1.23  | Shi H_2005   | M134xM117 |
| China | Han, Northeast          | 104     | 28     | 80  | 9  | 11.25 | This study   | M134xM117 |
| China | Han, North              | 115     | 37     | 225 | 34 | 15.11 | This study   | M134xM117 |
| China | Han, East               | 118.59  | 32.116 | 450 | 64 | 14.22 | This study   | M134xM117 |
| China | Han, South              | 110.75  | 22.25  | 158 | 14 | 8.86  | This study   | M134xM117 |
| China | Han, Northwest          | 98      | 43.5   | 47  | 9  | 19.15 | This study   | M134xM117 |
| China | Han, Southwest          | 105.585 | 28.99  | 36  | 5  | 13.89 | This study   | M134xM117 |
| China | Manchu                  | 123.195 | 42.26  | 16  | 3  | 18.75 | This study   | M134xM117 |
| China | Mongol                  | 119.77  | 49.22  | 196 | 2  | 1.02  | This study   | M134xM117 |

---
